# Supplementary material
Source: Research Square preprint supplement (doi:10.21203/rs.3.rs-9132980/v1)
Supplement: Supplementary file 1 [file 7cc3271c0c8307b639b2cd2c.docx]

**Appendix B**

**Popup Intake**

Name: DOB:

Phone:

Address: Insurance: Active? Applied?

PMH:

Allergies:

Primary substances used:

- any benzo use? - any alcohol use? -methadone?

Current frequency and amount of use (all substances):

Methods of use:

-IVDU?

- Interest in HIV, Hep B, Hep C screening at clinic?

Most recent opioid use:

History of buprenorphine (when last used, dose, efficacy, prescribing clinic if applicable):

History of LAI Bupe in past?

If so, # of doses: Last dose given:

Prior opioid overdose? (Last, number if known):

Typical withdrawal symptoms: Nausea/vomiting Body Aches Sweating Tremor Diarrhea Anxiety Runny Nose Other?

Prior SUD treatment and/or independent attempts to quit:

Day 2& 3 Preference:

Hoa Mai Hobson

Vitals:

Day 2:

Day 3:
