# Supplementary material
Source: Research Square preprint supplement (doi:10.21203/rs.3.rs-9132980/v1)
Supplement: Supplementary file 1 [file 877284b48801fa73b50fd5bf.docx]

**Appendix A**

**📝 Homeless Outreach Event – Needs Assessment Form**

**Date:** ____________  **Location:** ____________  **Worker Name:** ____________

**1. Basic Information**

- **First Name (or Alias):** _____________________
- **Age Range:**☐ Under 18 ☐ 18–24 ☐ 25–40 ☐ 41–60 ☐ Over 60
- **Gender:**☐ Male ☐ Female ☐ Non-binary ☐ Prefer not to say
- **Race/Ethnicity** (check all that apply):
  ☐ Black or African American
  ☐ White
  ☐ Hispanic or Latino/a/x
  ☐ Native American or Alaska Native
  ☐ Asian
  ☐ Native Hawaiian or Pacific Islander
  ☐ Middle Eastern or North African
  ☐ Multiracial
  ☐ Other: _____________________
  ☐ Prefer not to say
- **Veteran Status:**☐ Yes ☐ No ☐ Unknown

**2. Current Living Situation**

- ☐ Unsheltered (street, tent, car)
- ☐ Emergency Shelter
- ☐ Transitional Housing
- ☐ Couch Surfing
- ☐ Recently Evicted
- ☐ Other: ______________________
- **How long have you been without stable housing?**☐ <1 month ☐ 1–6 months ☐ 6–12 months ☐ Over 1 year

**3. Immediate Needs (Check all that apply)**

☐ Food/Snacks
☐ Hygiene Supplies
☐ Clothing/Shoes
☐ Blankets/Sleeping Bag
☐ Shelter/Temporary Housing
☐ Transportation
☐ Medical Care
☐ Wound Care
☐ Mental Health Support
☐ Substance Use Services
☐ ID Replacement
☐ Employment Help
☐ Benefits (e.g., SNAP, SSI)
☐ Case Management
☐ Other: ___________________

**4. Health & Safety**

- **Do you have any chronic health conditions?**☐ Yes ☐ No ☐ Prefer not to say
  If yes, briefly list: _________________________________________
- **Do you currently have any wounds or injuries that need attention?**☐ Yes ☐ No
  If yes, describe location or severity (if willing): ____________________
- **Do you feel safe where you sleep at night?**☐ Yes ☐ No ☐ Sometimes

**5. Substance Use & MOUD History**

- **Have you used opioids** [RD1] **(prescription or non-prescription) in the past year?**☐ Yes ☐ No ☐ Prefer not to say
- **Have you ever been on MOUD (e.g., Suboxone, Methadone, Vivitrol)?**☐ Yes ☐ No ☐ Not Sure
  If yes:
  - Which medication? ____________________
  - Are you currently in a MOUD program?
    ☐ Yes ☐ No ☐ Seeking to restart
  - other[RD2]

**6. History of Incarceration**

- **Have you ever been incarcerated?**☐ Yes ☐ No ☐ Prefer not to say
- **Were you released in the past 12 months?**☐ Yes ☐ No
- **Do you need support with:**☐ Reentry services  ☐ Legal documentation  ☐ Employment after incarceration
  ☐ Housing after incarceration  ☐ Probation/parole compliance

**7. Follow-Up or Referral Requested?**

- ☐ Yes ☐ No
  If yes, preferred method of contact (if any):
  ☐ Phone: _____________________
  ☐ Email: _____________________
  ☐ Through drop-in center/shelter: ___________________

**8. Social Worker Notes (Optional):**
